# Supplementary material for: A Fe3N/carbon composite electrocatalyst for effective polysulfides regulation in room-temperature Na-S batteries
Source: PubMed Central journal article supplement (PMC8566531; doi:10.1038/s41467-021-26631-y), 2021-11-03
Supplement: 41467_2021_26631_MOESM1_ESM.pdf [file 41467_2021_26631_MOESM1_ESM.pdf]

## ***Supplementary Information***

### **A Fe<sub>3</sub>N/carbon composite electrocatalyst for effective polysulfides regulation in room-temperature Na-S batteries**

Yuruo Qi<sup>1</sup>, Qing-Jie Li<sup>3</sup>, Yuanke Wu<sup>1</sup>, Shu-juan Bao<sup>1</sup>, Changming Li<sup>1</sup>, Yuming Chen<sup>2,3\*</sup>, Guoxiu Wang<sup>4\*</sup>, Maowen Xu<sup>1\*</sup>

<sup>1</sup> *Key Laboratory of Luminescence Analysis and Molecular Sensing, Ministry of Education, Faculty of Materials and Energy, Southwest University, Chongqing 400715, PR China*

<sup>2</sup> *College of Environmental Science and Engineering, Fujian Normal University, Fuzhou 350007, PR China*

<sup>3</sup> *Department of Nuclear Science and Engineering, Massachusetts Institute of Technology, Cambridge, Massachusetts 02139, United State*

<sup>4</sup> *Center for Clean Energy Technology, University of Technology Sydney, Sydney, NSW 2007, Australia*

*These authors contribute equally: Yuruo Qi, Qing-Jie Li*

*\*Correspondence: yumingc126@126.com; Guoxiu.Wang@uts.edu.au; xumaowen@swu.edu.cn*

## Supplementary Figures

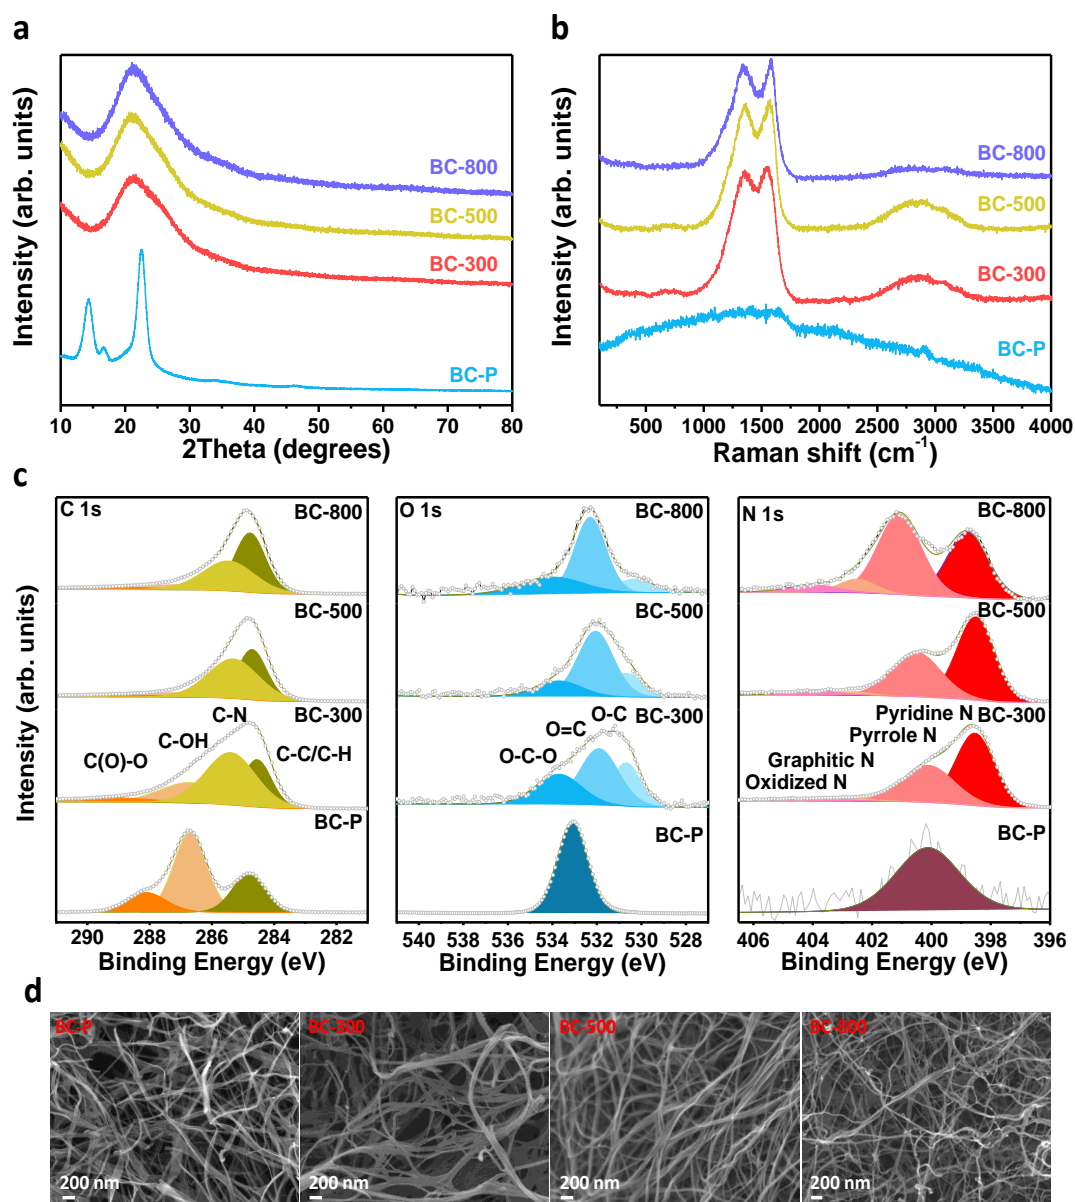

**Supplementary Figure 1.** XRD (a), Raman (b), XPS (c) and FESEM images (d) of the pristine BC, BC-300, BC-500 and BC-800.

To get insights on the carbonization mechanism of the bacterial cellulose, the microstructure and morphology of the product carbonized at different considerations (the pristine BC, 300 °C 1h, 300 °C 1h and 500 °C 2h, 300 °C 1h and 800 °C 2h;

abbreviated as BC-P, BC-300, BC-500 and BC-800) were characterized by XRD, Raman, XPS, FESEM and Elemental analysis, as summarized in Supplementary Figure 1 and Supplementary Table 1-2. The bare BC precursor shows three diffraction peaks at  $14.3^\circ$ ,  $16.7^\circ$  and  $22.5^\circ$ . A broad peak of amorphous carbon appears at  $21.5^\circ$  after pyrolyzed at  $300^\circ\text{C}$  and maintains almost unchanged with the temperature increasing. Similarly, the Raman spectra of BC-300, BC-500 and BC-800 are almost the same. FESEM images in Supplementary Figure 1d show that these composite fibers become thinner gradually with the increasing temperature.

Unlike the minor discrepancy in XRD and Raman, the surface functional groups on BC-P, BC-300, BC-500 and BC-800 are totally different. The C *1s* spectrum of the BC precursor can be fitted into three peaks of C-C/C-H, C-OH and C(O)-O at binding energies of 284.8, 286.7 and 288.1 eV. Except for these three peaks, both BC-300, BC-500 and BC-800 possess strong bonds ascribed to C-N groups at around 285.4 eV. It is obvious that the proportion of C-N bonds compared with C-C/C-H declines as the increase of temperatures. In the O *1s* spectrum, three bands of O-C, O=C and O-C-O are detected at 530.7, 531.9 and 533.7 eV for BC-300. As the rise of temperature, the amount of O=C species increases while those of O-C and O-C-O decrease dramatically. Finally, the O=C groups occupy about 63.4wt.% in BC-800, becoming the main part of oxygen. It has been reported that O=C groups can boost the affinity between the carbon anode and sodium ions, a favorable feature for performance enhancement. A weak N *1s* signal is observed for the pristine BC even before  $\text{NH}_3$  treatment. The small amount of “intrinsic” nitrogen atoms come from the residual

nitrogen-containing compounds left by the culture media and secretions. At 300 °C, pyridinic and pyrrolic N are two main N functional groups. As temperature rises, part of the pyridinic N converts into pyrrolic, graphitic and oxidized N. Finally, the total content of pyrrdinic and pyrrollic N occupies 88.1% in BC-800, which can strongly bond to polysulfides and increase electronic conductivity. In a whole, as concluded in Supplementary Table 2, the content of N/O is the highest at 300 °C and it decreases with the rise of temperature.

To accurately examine the variation of elemental content, elemental analysis was employed. As listed in Supplementary Table 1, the pristine BC consists of 46.86wt.% C, 0.12wt.% N, 46.37wt.% O and 6.65wt.% H. Apparently, a small amount (0.12wt.%) of nitrogen is existed in BC-P, in line with the XPS result. When treated at 300 °C, most of the O/H volatilizes and a large amount of N (31.45wt.%) is doped. As increase of temperature, the amount of N/O/H reduces and the content of C increases remarkably. Finally, the C, N, O and H in BC-800 are 89.77wt.%, 6.45wt.%, 2.56wt.% and 1.22wt.%, respectively. The elemental content and variation trend versus temperatures obtained by elemental analysis are highly consistent with the above-mentioned XPS results. In a whole, a carbon matrix containing a certain amount of O=C, pyridinic N, pyrrolic N with little H is obtained at 800 °C.

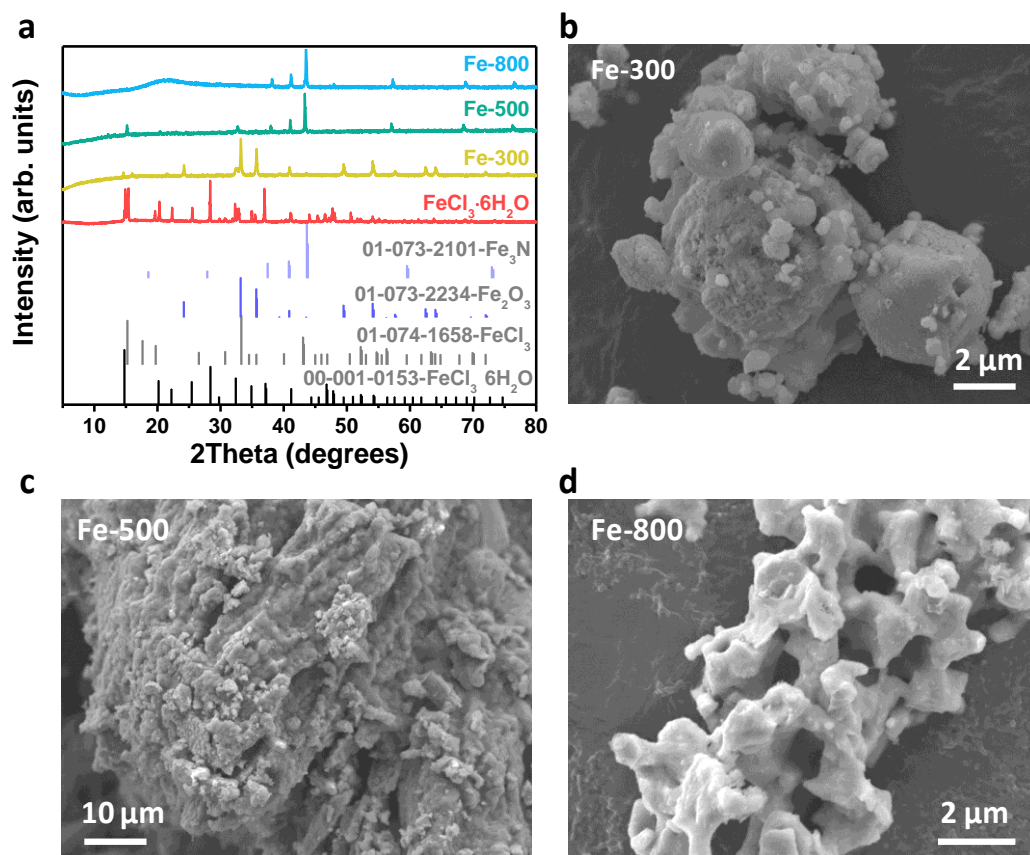

**Supplementary Figure 2.** XRD patterns (a) and FESEM images (b-d) of the FeCl<sub>3</sub>·6H<sub>2</sub>O starting material, Fe-300, Fe-500 and Fe-800.

To understand the growth mechanism of Fe<sub>3</sub>N, FeCl<sub>3</sub>·6H<sub>2</sub>O was sintered in NH<sub>3</sub> atmosphere at different conditions (300 °C 1h, 300 °C 1h and 500 °C 2h, 300 °C 1h and 800 °C 2h; abbreviated as Fe-300, Fe-500, Fe-800). XRD patterns for products obtained at different conditions were shown in Supplementary Figure 2a. Note that there is a few of FeCl<sub>3</sub> in the starting material due to the loss of crystal water. After heated at 300 °C, most of the sample converts into Fe<sub>2</sub>O<sub>3</sub> with a small proportion of unreacted FeCl<sub>3</sub>·6H<sub>2</sub>O. The product obtained at 300 °C presents as large particles. In the case of 500 °C, the Fe<sub>3</sub>N dominates while a small amount of Fe<sub>2</sub>O<sub>3</sub>, FeCl<sub>3</sub>, FeCl<sub>3</sub>·6H<sub>2</sub>O could still be discovered. The product obtained at 500 °C is composed of

several small particles. Finally, a porous structured  $\text{Fe}_3\text{N}$  is obtained at  $800\text{ }^\circ\text{C}$ . In a whole, the  $\text{FeCl}_3 \cdot 6\text{H}_2\text{O}$  turns into  $\text{Fe}_2\text{O}_3$  at the low temperature range (around  $300\text{ }^\circ\text{C}$ ) and then fully converts into  $\text{Fe}_3\text{N}$  at  $800\text{ }^\circ\text{C}$ .

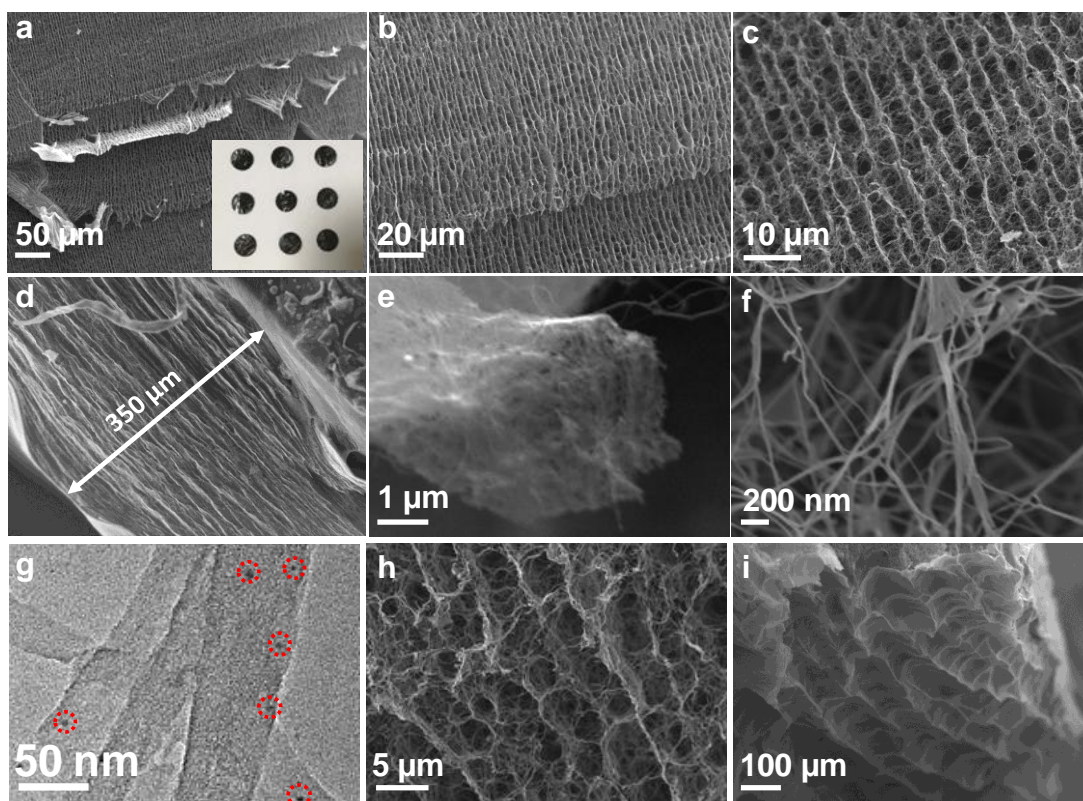

**Supplementary Figure 3.** FESEM (a-f, h-i) and TEM (g) images of  $\text{Fe}_3\text{N}$ -NMCN.

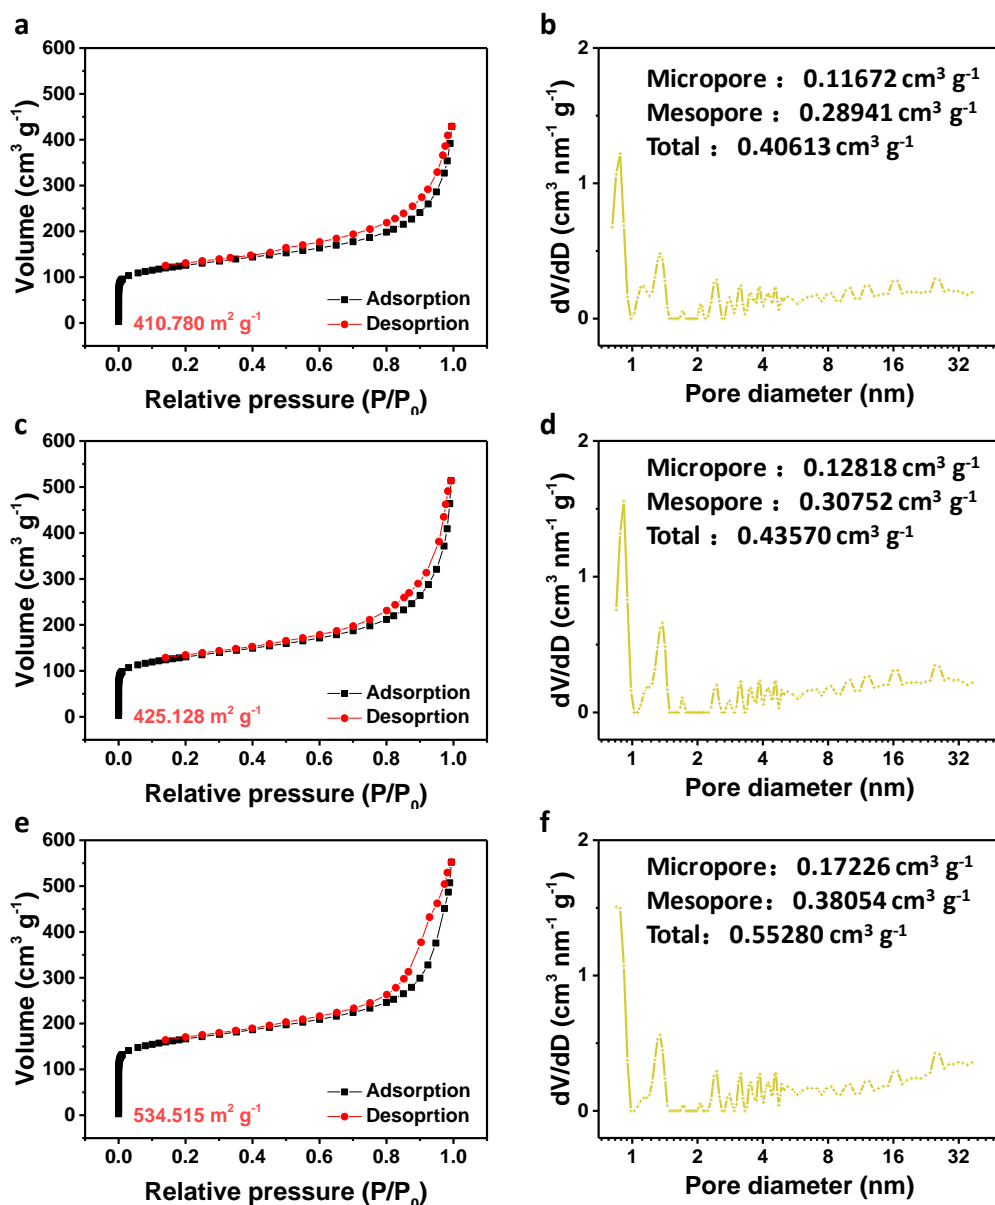

**Supplementary Figure 4.** Adsorption/desorption isotherms and pore-size distribution curves of BC-Ar (**a-b**), BC-NH<sub>3</sub> (**c-d**) and Fe<sub>3</sub>N-NMCN (**e-f**).

The adsorption/desorption isotherms and pore-size distribution curves of BC-Ar, BC-NH<sub>3</sub> and Fe<sub>3</sub>N-NMCN were compared in Supplementary Figure 4. The BET surface area, total pore volume, micropores volume and mesopores volume were summarized in Supplementary Table 3. As displayed, the Fe<sub>3</sub>N-NMCN sample shows

the highest BET surface area of  $535 \text{ m}^2 \text{ g}^{-1}$  while those of BC-Ar and BC-NH<sub>3</sub> are 411 and  $425 \text{ m}^2 \text{ g}^{-1}$ .

The total pore volume, micropores volume and mesopores volume for Fe<sub>3</sub>N-NMCN are 0.55, 0.17,  $0.38 \text{ cm}^3 \text{ g}^{-1}$ , respectively. The ratio of micropores is 31.0%. As for BC-NH<sub>3</sub> and BC-Ar, both the total pore volume and the proportion of micropores are reduced. It is likely that the heat treatment in NH<sub>3</sub> and loading of Fe<sub>3</sub>N can introduce some mesopores and then enhance surface areas, which is beneficial for the immobilization of sulfur thus enabling a high-loading cathode.

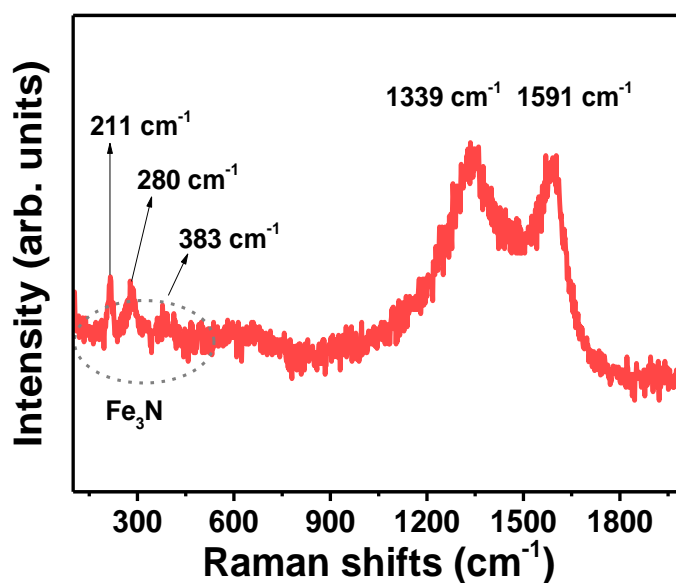

**Supplementary Figure 5.** Raman spectrum of Fe<sub>3</sub>N-NMCN.



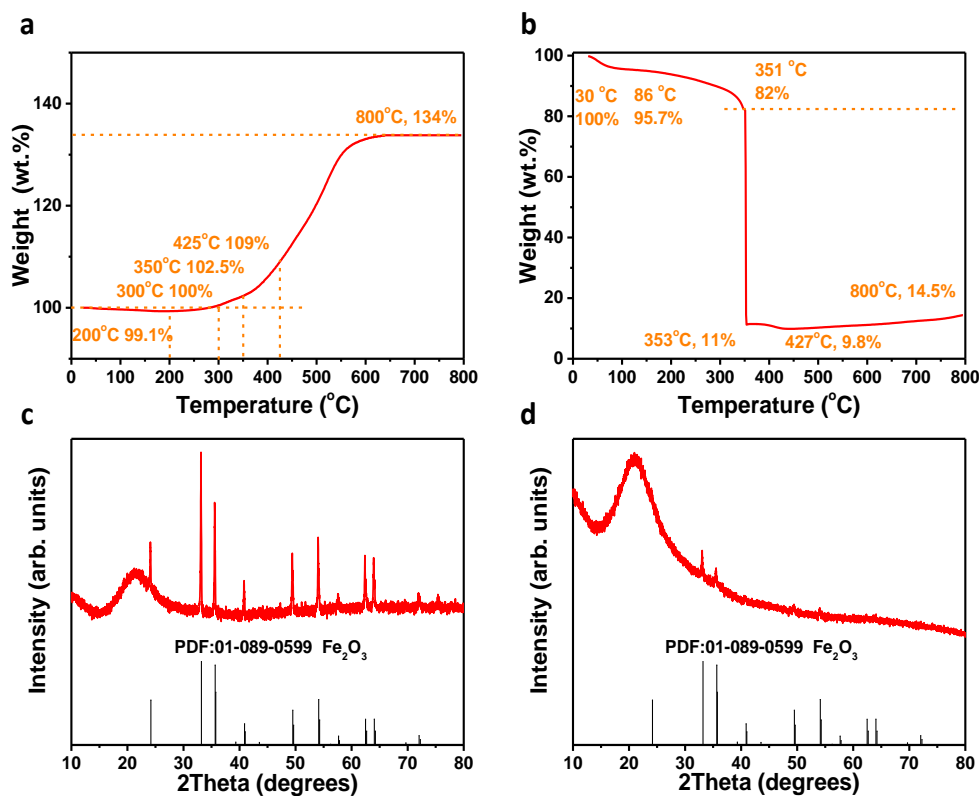

**Supplementary Figure 6.** Calculation of Fe<sub>3</sub>N content in the Fe<sub>3</sub>N-NMCN composite.

**a-b** TGA tests of the bare Fe<sub>3</sub>N powder (**a**) and the Fe<sub>3</sub>N-NMCN composite (**b**). **c-d** XRD patterns of the final products after TGA tests from the bare Fe<sub>3</sub>N powder (**c**) and the Fe<sub>3</sub>N-NMCN composite (**d**).

TGA tests were employed to detect the loading of Fe<sub>3</sub>N in the Fe<sub>3</sub>N-NMCN composite. To clarify the transformation process of Fe<sub>3</sub>N, TGA tests of the bare Fe<sub>3</sub>N powder and Fe<sub>3</sub>N-NMCN in O<sub>2</sub> atmosphere were conducted (Supplementary Figure 6a-b). Moreover, the phase information of the final products after TGA tests was detected by XRD (Supplementary Figure 6c-d). The bare Fe<sub>3</sub>N powder was obtained through the heat treatment of FeCl<sub>3</sub> 6H<sub>2</sub>O at 300 °C for 1 h and then 800 °C for 2 h.

As displayed in Supplementary Figure 6c-d, both products obtained after TGA tests are Fe<sub>2</sub>O<sub>3</sub> (159.6 g mol<sup>-1</sup>). When we assume that there is 1 mol Fe<sub>3</sub>N (181.4 g

mol<sup>-1</sup>), there should be 1.5 mol Fe<sub>2</sub>O<sub>3</sub> after the TGA test since the mole number of Fe is constant. During this process, the weight increment is 132.0wt.% (=159.6×1.5/181.4). This result is highly consistent with the TGA curve of the bare Fe<sub>3</sub>N powder in Supplementary Figure 6a, where the weight increase between room temperature and 800 °C is about 134wt.% and the main weight variation is in the range of 350 and 800 °C.

Therefore, it can be deduced that the weight loss (89wt.%) of Fe<sub>3</sub>N-NMCN before 353 °C (Supplementary Figure 6b) is exclusively originated from the consumption of carbon matrix in Fe<sub>3</sub>N-NMCN and is not related to Fe<sub>3</sub>N, while the weight increment (132wt.% = 14.5wt.%/11wt.%) between 353 and 800 °C is only from the oxidation of Fe<sub>3</sub>N to Fe<sub>2</sub>O<sub>3</sub>. From above analyses, it has been determined that the weight percentage of Fe<sub>3</sub>N in Fe<sub>3</sub>N-NMCN is 11wt%.

Elemental analysis (Supplementary Table 4) was conducted to obtain the total content of C, N, H and O in these composites. As demonstrated, the doped N in BC-NH<sub>3</sub> and BC-Ar are 6.45wt.% and 0.34wt.%, respectively. Note that the small amount of “intrinsic” nitrogen atoms in BC-Ar comes from the residual nitrogen-containing compounds left by the culture media and secretions. In addition, Supplementary Table 4 shows that the weight ratio of C, N, H, O in the Fe<sub>3</sub>N-NMCN are 61.50wt.%, 10.21wt.%, 1.48wt.% and 12.38wt.%, respectively. According to the above TGA result, the loading of Fe<sub>3</sub>N is 11wt.% and thus the N from the Fe<sub>3</sub>N is calculated to 0.85wt.% (=11×14/(56×3+14)=0.85wt.%). Thus, the doped N in the

composite is 9.36wt.% ( $10.21-0.85=9.36\text{wt.}\%$ ). In a whole, the N doped in BC-Ar, BC-NH<sub>3</sub> and Fe<sub>3</sub>N-NMCN are 0.34wt.%, 6.45wt.% and 9.36wt.%, respectively.

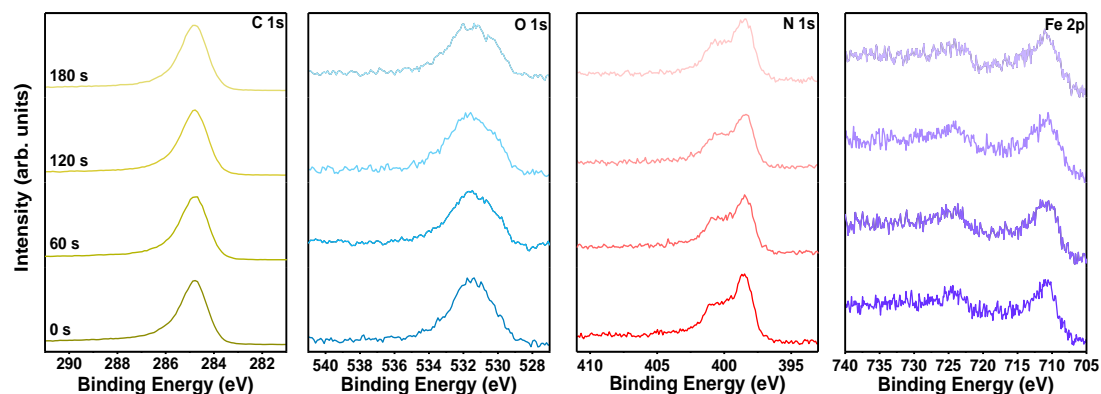

**Supplementary Figure 7.** XPS depth profiles after 0, 60, 120, 180 s of sputtering.

The TEM images in Figure 1d-e and Supplementary Figure 3 show that the Fe<sub>3</sub>N quantum dots are coated with a carbon fiber. To further detect whether the N-doping and Fe<sub>3</sub>N present on carbon surface or are embedded in the bulk of the material, XPS depth profiling results after 0, 60, 120, 180 s of sputtering were collected as Supplementary Figure 7. As displayed, all elements (C, O, N, Fe) are existed throughout the sample. Moreover, the peak shape maintains unchanged. The above results demonstrate that both the N-doping and Fe<sub>3</sub>N are distributed uniformly through the whole sample.

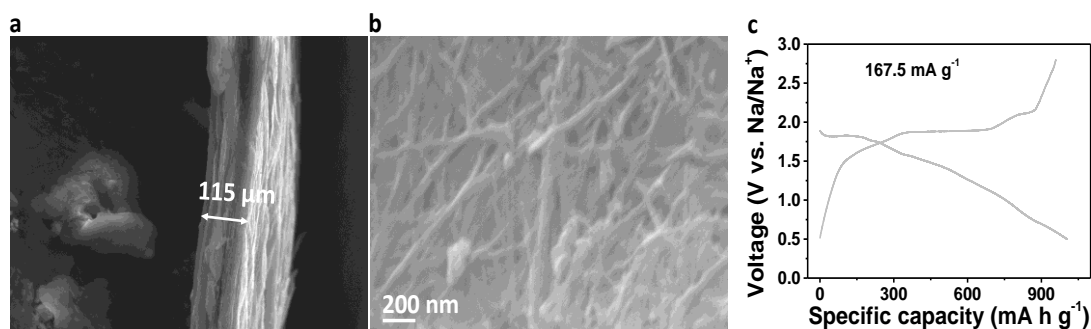

**Supplementary Figure 8.** FESEM images (a-b) and voltage-capacity curve (c) of the compact S@Fe<sub>3</sub>N-NMCN electrode obtained through a calendaring-infiltration strategy.

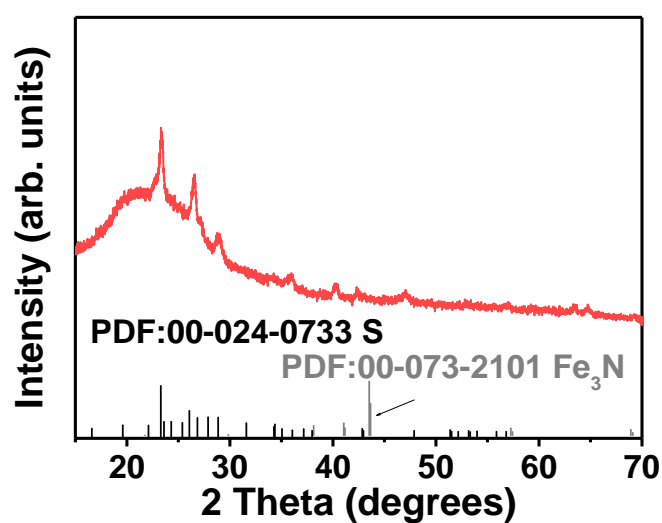

**Supplementary Figure 9.** XRD pattern of S@Fe<sub>3</sub>N-NMCN.

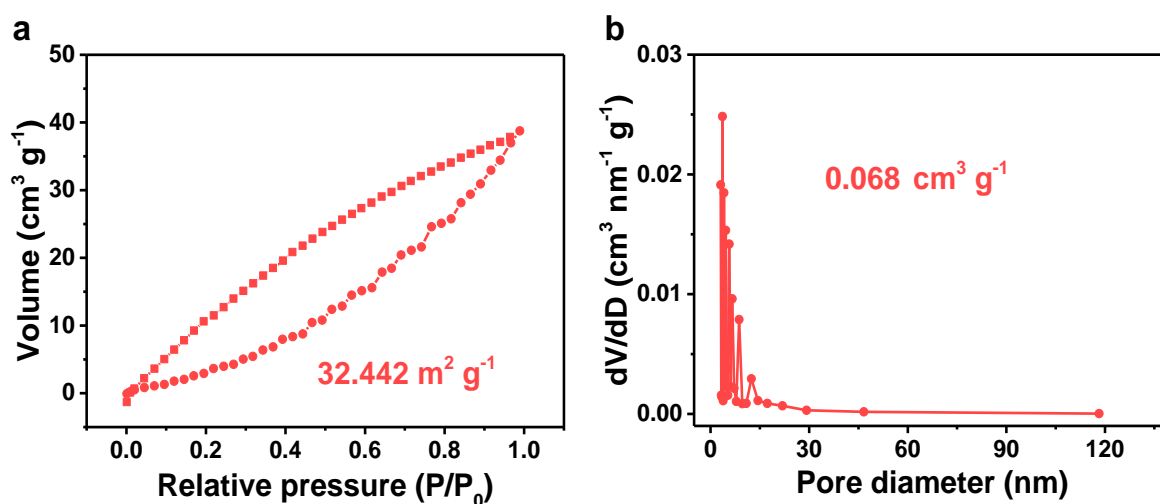

**Supplementary Figure 10.** N<sub>2</sub> adsorption/desorption curves (a) and corresponding pore-size distribution curve (b) of S@Fe<sub>3</sub>N-NMCN.

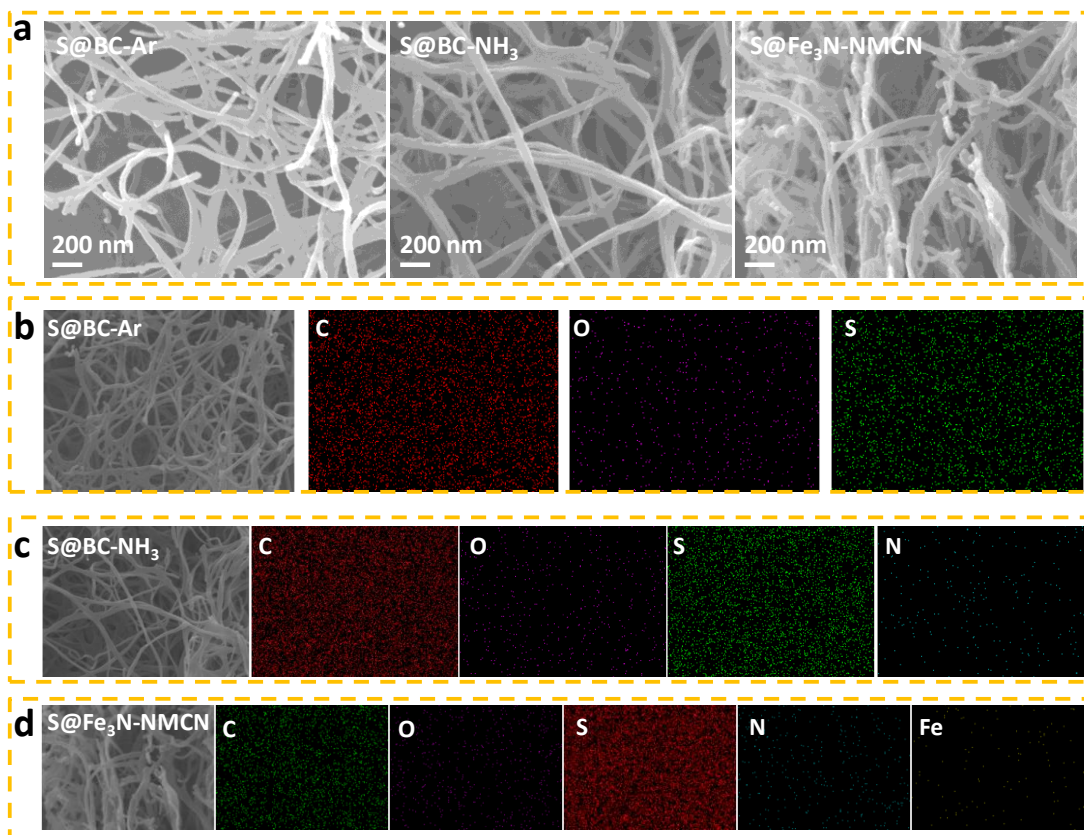

**Supplementary Figure 11.** FESEM and corresponding EDS mapping images of S@BC-Ar, S@BC-NH<sub>3</sub> and S@Fe<sub>3</sub>N-NMCN, respectively.

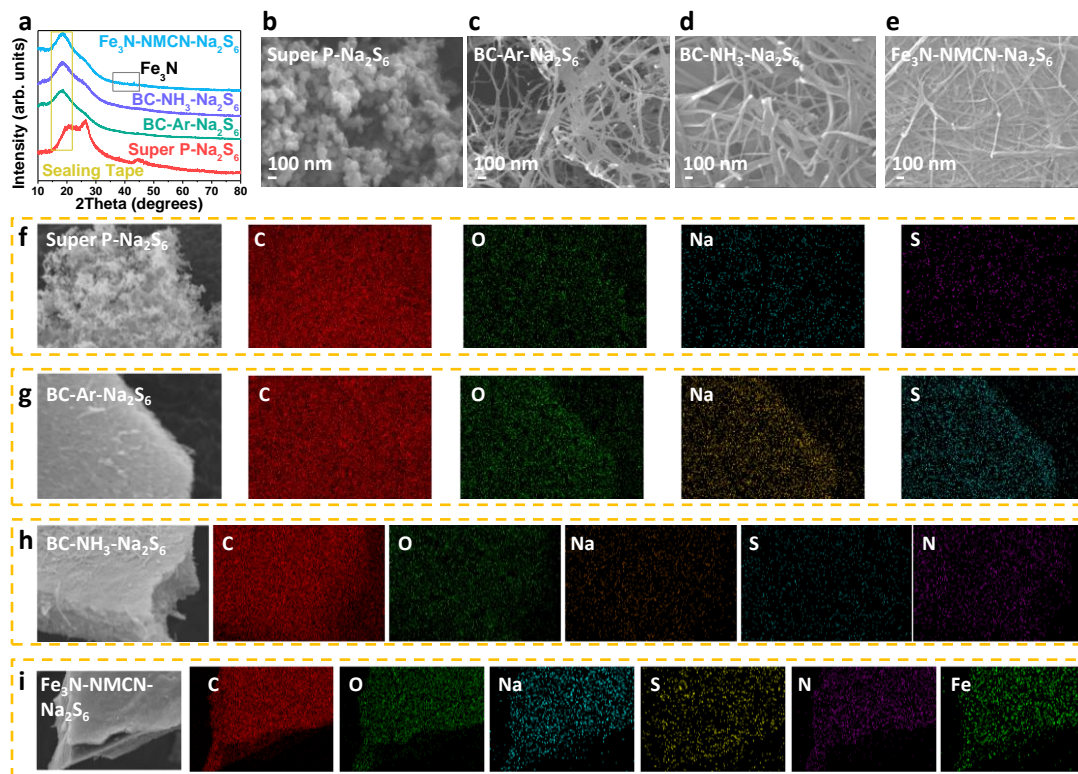

**Supplementary Figure 12.** XRD (a), FESEM images (b-e) and EDS mapping images (f-i) of Super P-Na<sub>2</sub>S<sub>6</sub>, BC-Ar-Na<sub>2</sub>S<sub>6</sub>, BC-NH<sub>3</sub>-Na<sub>2</sub>S<sub>6</sub> and Fe<sub>3</sub>N-NMCM-Na<sub>2</sub>S<sub>6</sub>, respectively.

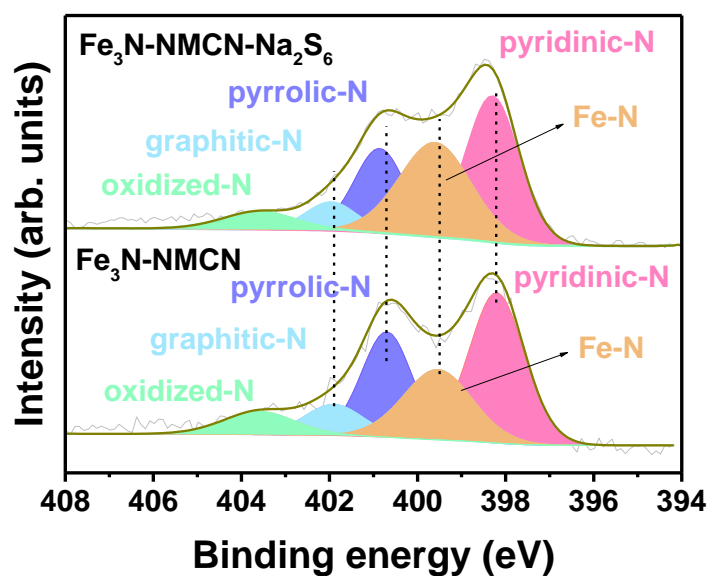

**Supplementary Figure 13.** N 1s XPS spectra of Fe<sub>3</sub>N-NMCM and Fe<sub>3</sub>N-NMCM-Na<sub>2</sub>S<sub>6</sub>.

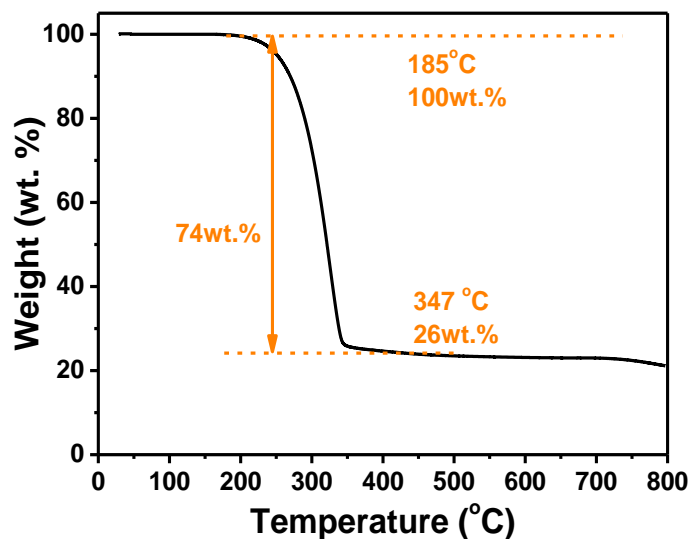

Supplementary Figure 14. TG curve of S@BC-NH<sub>3</sub>.

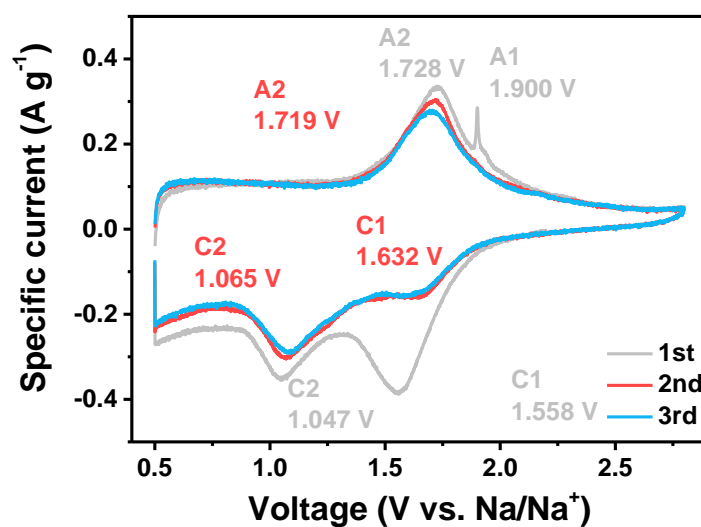

Supplementary Figure 15. First three CV curves of S@BC-NH<sub>3</sub> at a scan rate of 0.2 mV s<sup>-1</sup>.

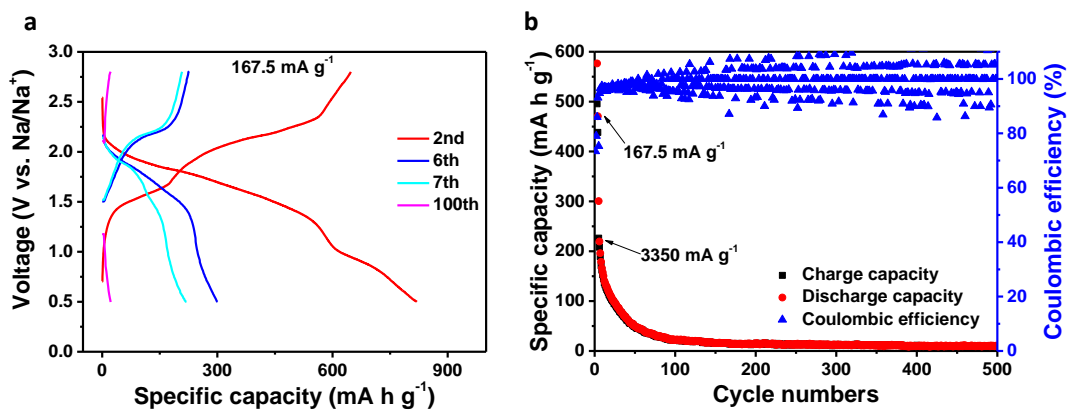

**Supplementary Figure 16.** Discharge/charge curves (a) and cycling performance (b) of S@Fe<sub>3</sub>N-NMCN with 1M NaClO<sub>4</sub> in EC/DEC (1:1 by volume) electrolyte in Na-S batteries.

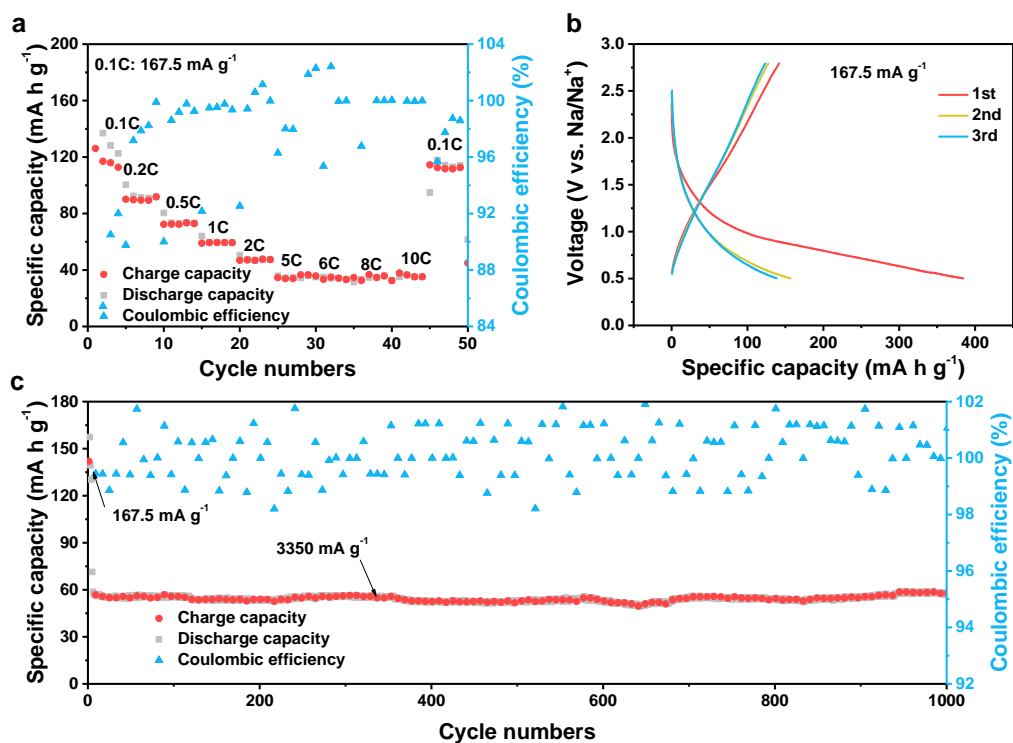

**Supplementary Figure 17.** Na storage performance of the Fe<sub>3</sub>N-NMCN substrate.



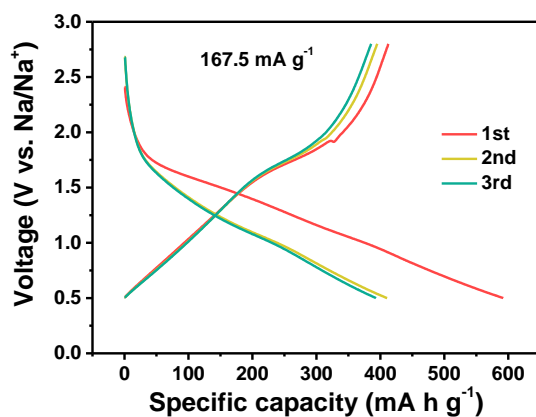

Supplementary Figure 18. Galvanostatic discharge/charge curves of S@BC-NH<sub>3</sub>.

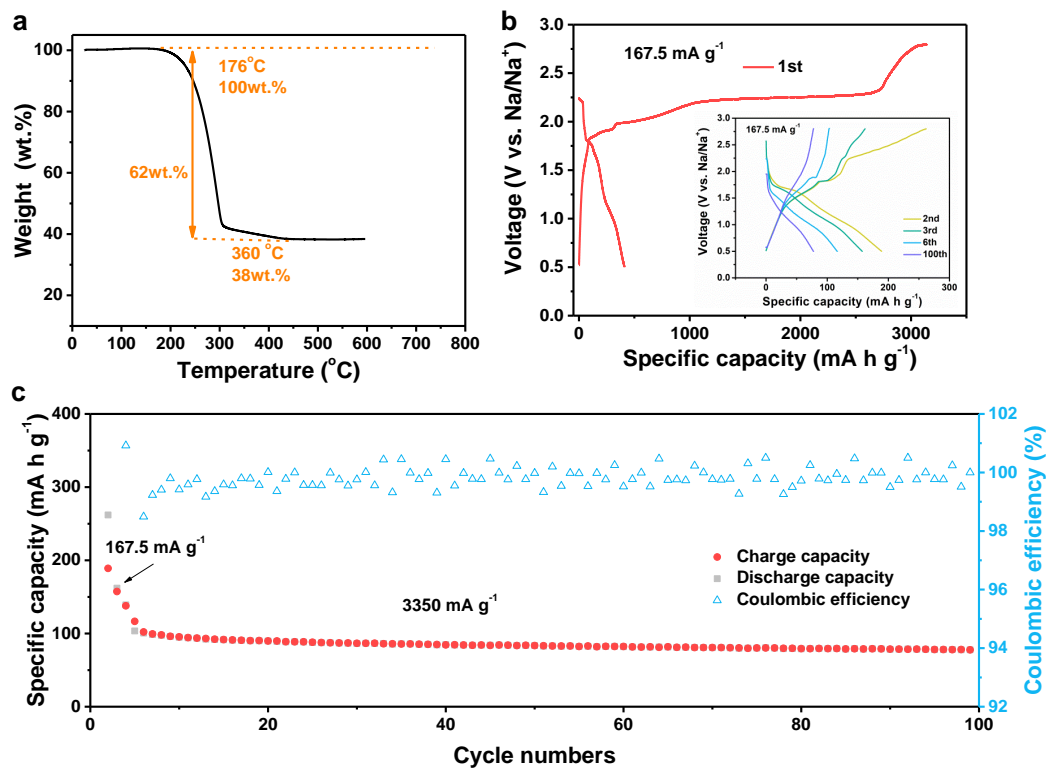

Supplementary Figure 19. Electrochemical performance of S@BC-Ar.

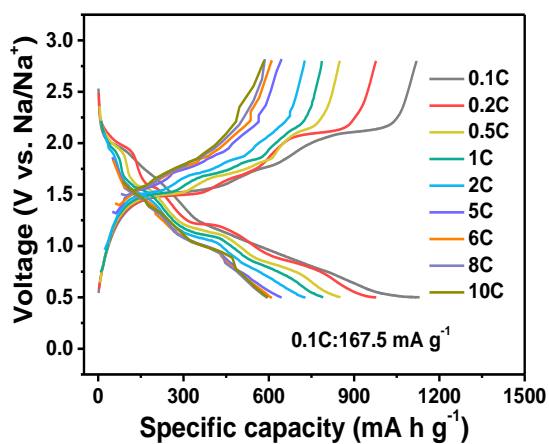

**Supplementary Figure 20.** Galvanostatic discharge/charge curves of S@Fe<sub>3</sub>N-NMCN at different specific currents.

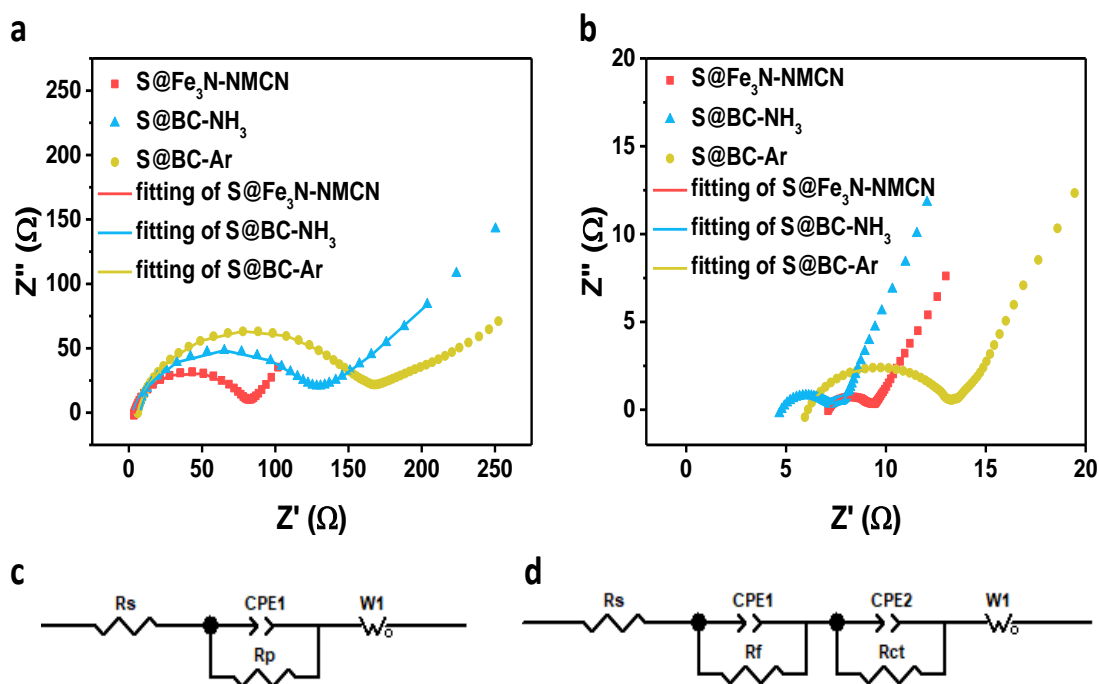

**Supplementary Figure 21.** EIS spectra and corresponding equivalent circuit diagrams of S@BC-Ar, S@BC-NH<sub>3</sub>, S@Fe<sub>3</sub>N-NMCN before (a, c) and after cycle (b, d).

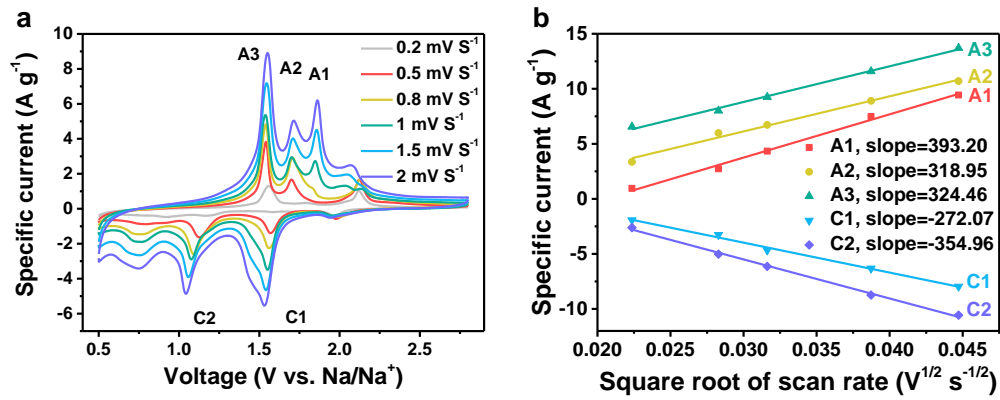

**Supplementary Figure 22.** (a) CV of S@Fe<sub>3</sub>N-NMCN at different scan rates of 0.2, 0.5, 0.8, 1, 1.5 and 2 mV s<sup>-1</sup>, (b) Plots of peak currents and square roots of scan rates.

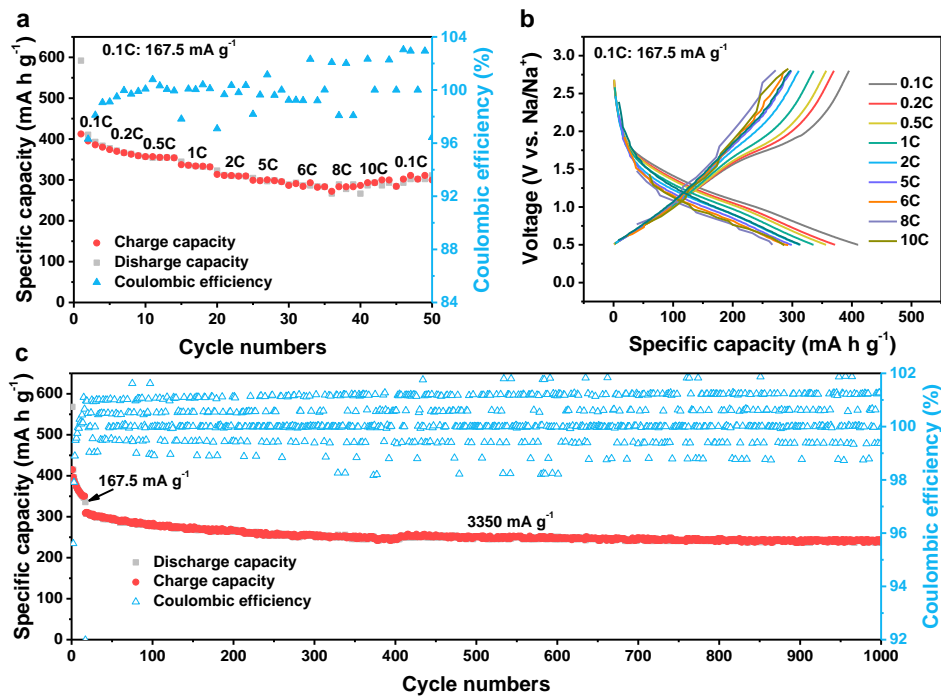

**Supplementary Figure 23.** Rate and cycling performance of S@BC-NH<sub>3</sub>.

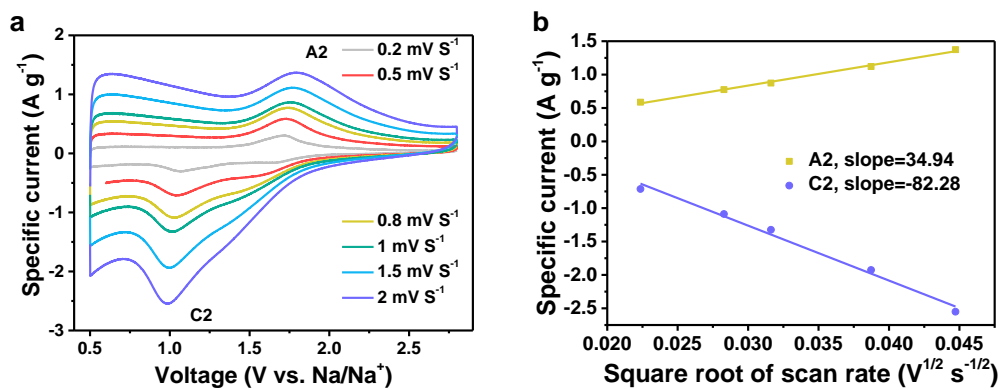

**Supplementary Figure 24.** (a) CV of S@BC-NH<sub>3</sub> at different scan rates of 0.2, 0.5, 0.8, 1, 1.5 and 2 mV s<sup>-1</sup>, (b) Plots of peak currents and square roots of scan rates.

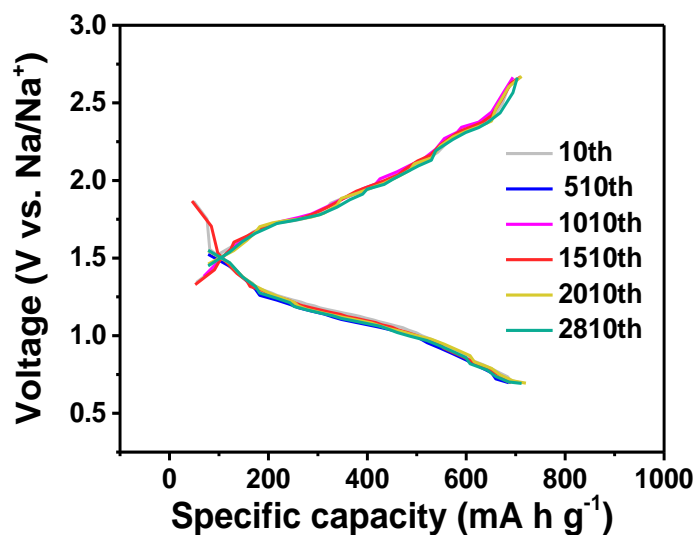

**Supplementary Figure 25.** Voltage-capacity curves of the S@Fe<sub>3</sub>N-NMCN electrode during the long term cycling test at 8375 mA g<sup>-1</sup> after 10 cycles at 167.5 mA g<sup>-1</sup>.

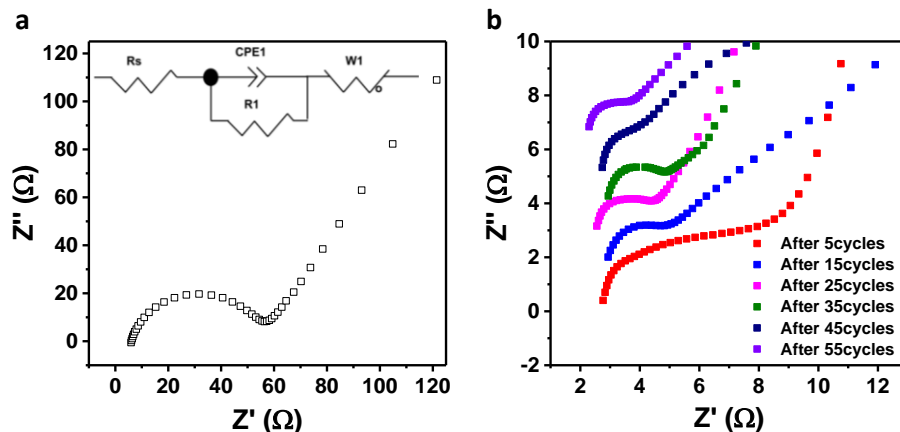

**Supplementary Figure 26.** EIS of batteries with S@Fe<sub>3</sub>N-NMCN after different cycles at a specific current of 83.75 mA g<sup>-1</sup>.

It is well accepted that the capacity increase in the first few cycles could stem from the activation of the electrode, as widely observed in previous reports. Furthermore, to verify the above speculation, the electrochemical impedance spectra during first 55 cycles at a specific current of 83.75 mA g<sup>-1</sup> (ten times smaller than that in Figure 5f) were recorded, as shown in Supplementary Figure 26 and Supplementary Table 7. The fresh battery has a resistance of 71.25 Ω. The resistance declines dramatically to 6.86 Ω after 5 cycles (around 200 hours) and 0.89 Ω after 15 cycles (around 600 hours). Moreover, the value of resistance maintains unchanged in the following cycles. The evolution of EIS indicates that the proposed electrode can reach stable in about 600 hours. In addition, the ambient temperature change can also lead to the slight capacity variation. Therefore, the slight capacity variation (Figure 5f) can be due to the electrochemical activation process and the ambient temperature change.

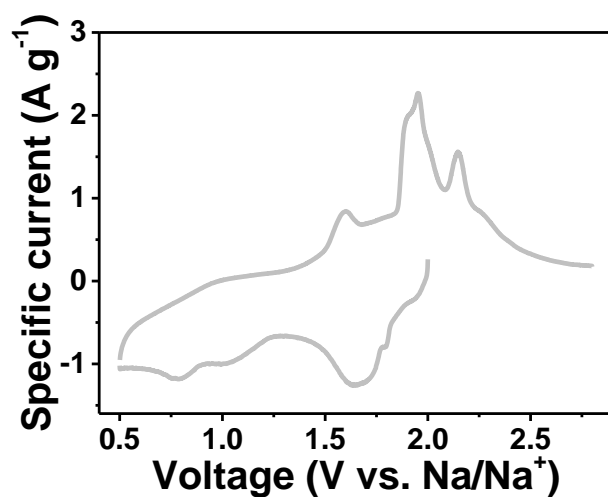

**Supplementary Figure 27.** CV curve for *in situ* Raman.

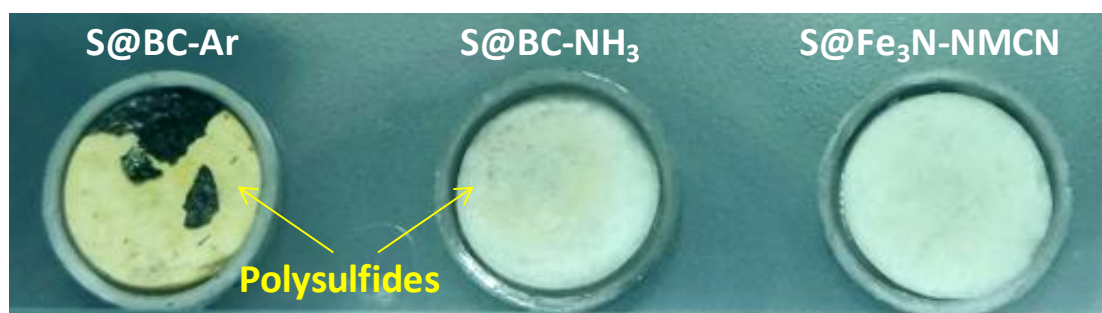

**Supplementary Figure 28.** Optical images of the separators from batteries with S@BC-Ar, S@BC-NH<sub>3</sub> and S@Fe<sub>3</sub>N-NMCN, respectively.

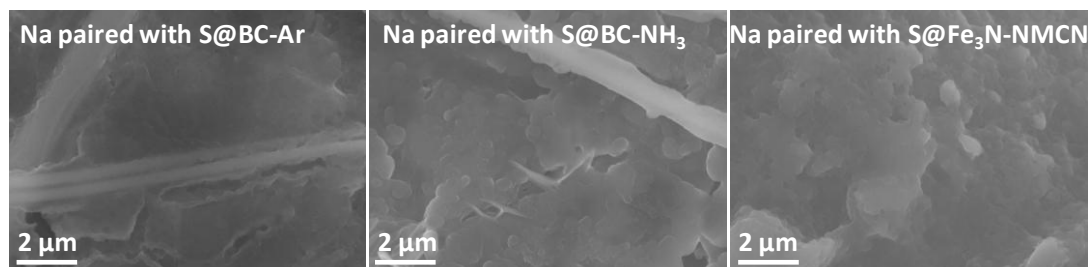

**Supplementary Figure 29.** FESEM images of cycled Na metal paired with S@BC-Ar, S@BC-NH<sub>3</sub> and S@Fe<sub>3</sub>N-NMCN, respectively.

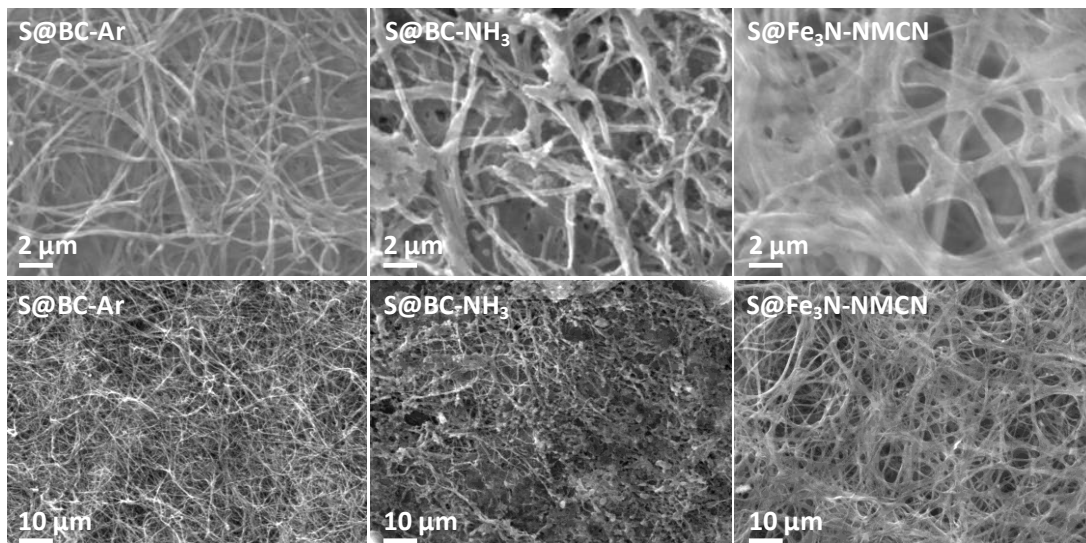

**Supplementary Figure 30.** FESEM images of cycled S@BC-Ar, S@BC-NH<sub>3</sub> and S@Fe<sub>3</sub>N-NMCN electrodes, respectively.

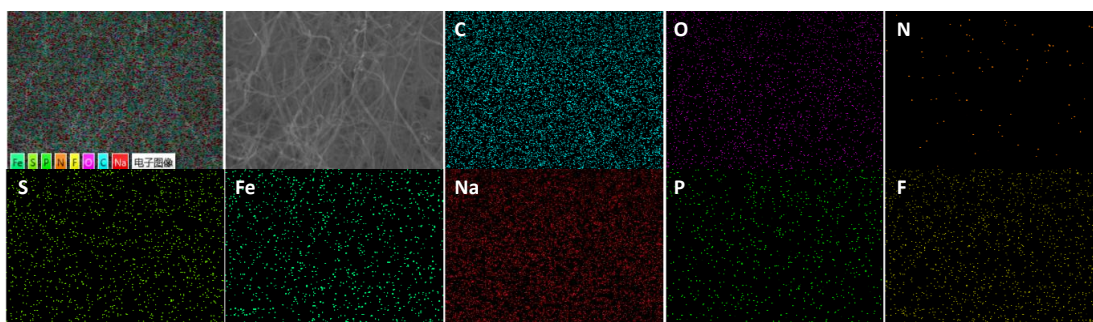

**Supplementary Figure 31.** EDS mapping images of cycled S@BC-Ar.

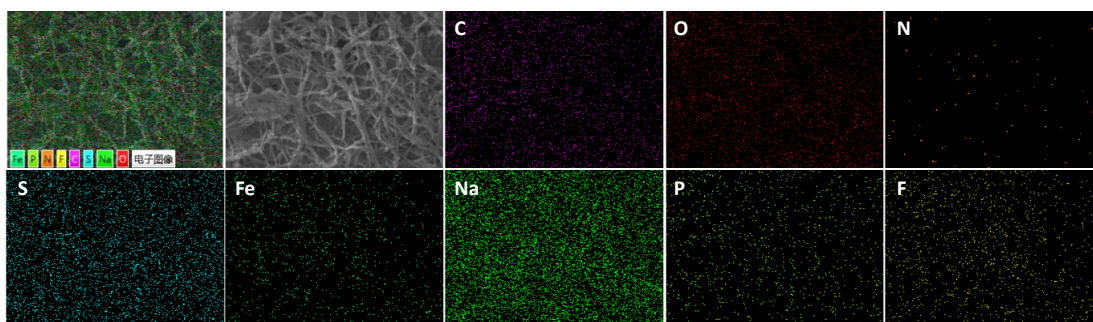

**Supplementary Figure 32.** EDS mapping images of cycled S@BC-NH<sub>3</sub>.

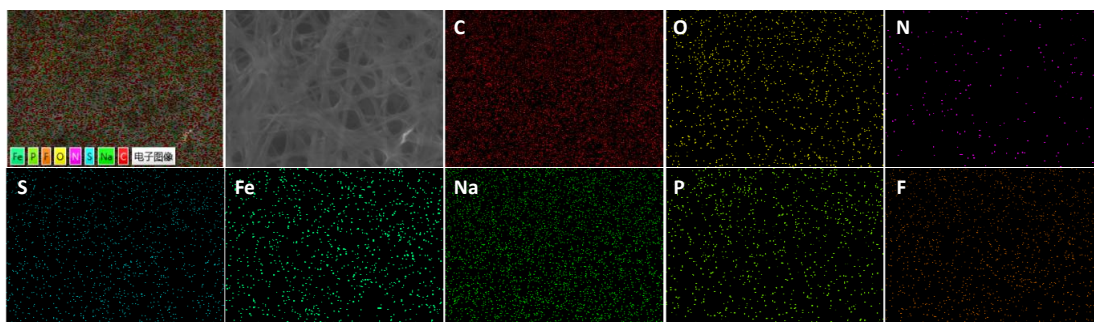

**Supplementary Figure 33.** EDS mapping images of cycled S@Fe<sub>3</sub>N-NMCN.

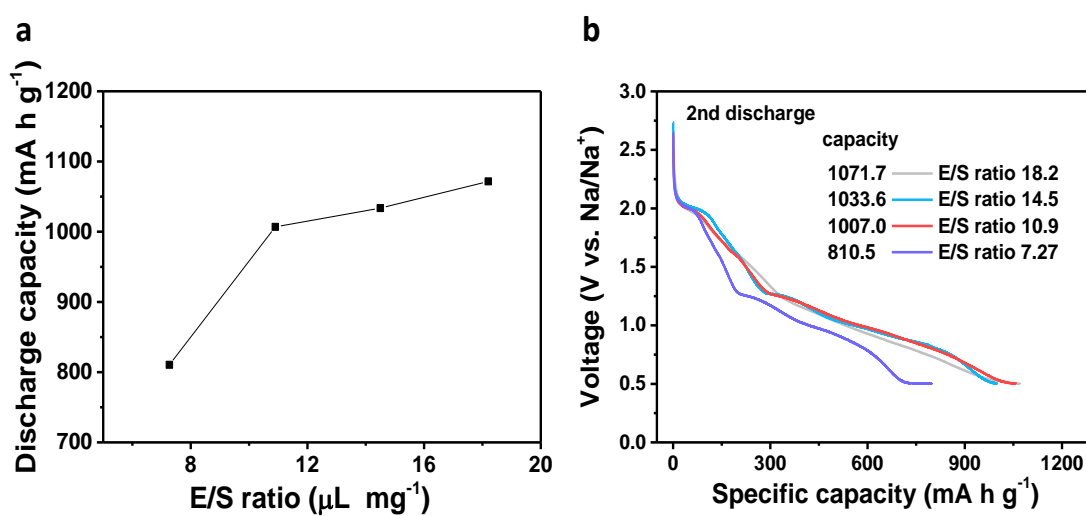

**Supplementary Figure 34.** Effect of electrolyte/sulfur (E/S) ratio on discharge capacity of the S@Fe<sub>3</sub>N-NMCN electrode (**a**) and discharge profiles at different E/S ratios (**b**).



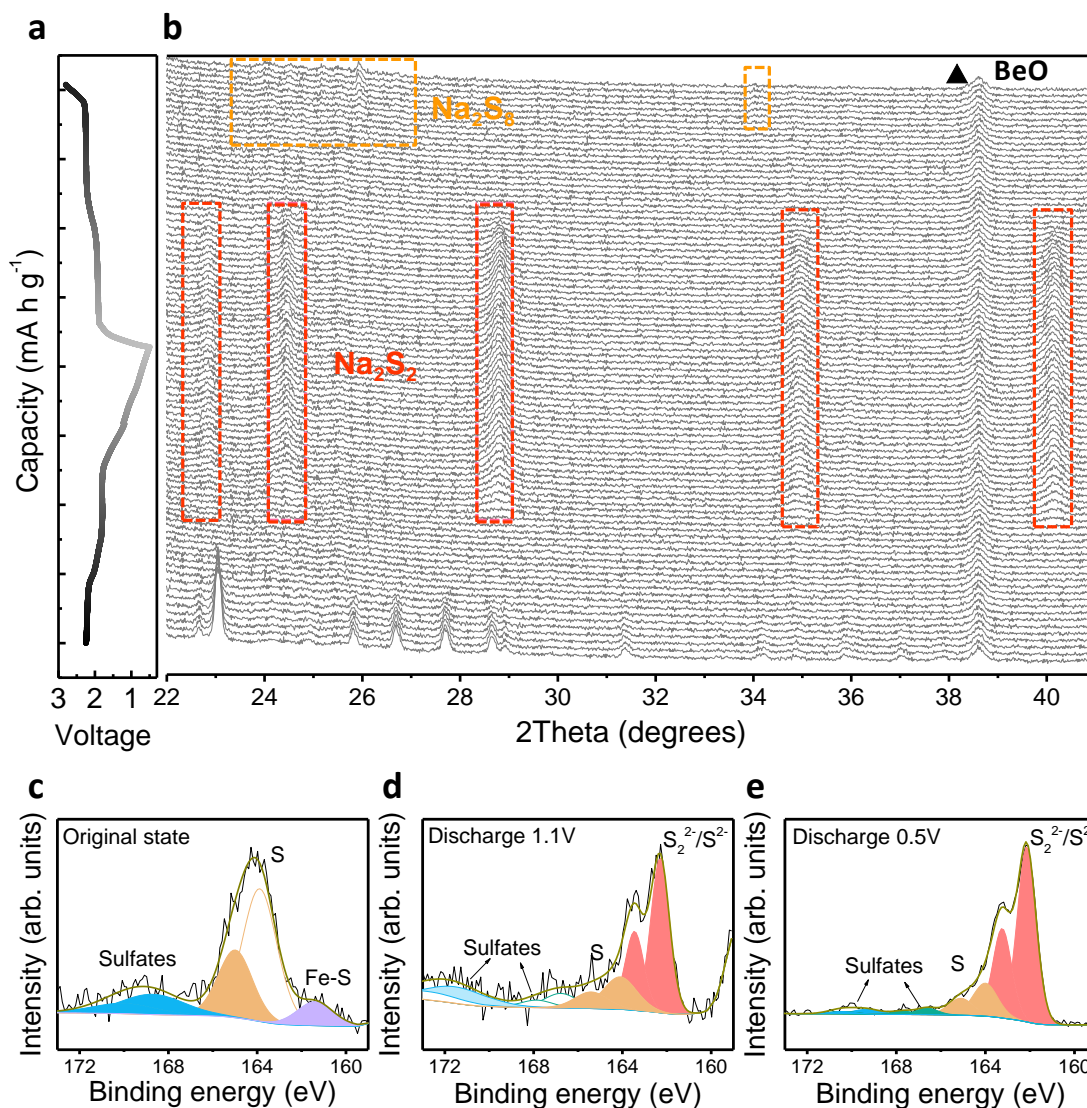

**Supplementary Figure 35.** *In situ* lab. XRD of the S@Fe<sub>3</sub>N-NMCN electrode at a specific current of 167.5 mA g<sup>-1</sup> with a low E/S ratio of 7.27 uL mg<sup>-1</sup> in an electrochemical window of 2.8 - 0.5 V (b) and corresponding discharge/charge profile (a). c-d S 2p XPS spectra at the original state (c), discharged to 1.1 V (d) and discharged to 0.5 V (e).

There may be three reasons for the fact that Na<sub>2</sub>S is not presented in the *in situ* XRD pattern. First, only a few Na<sub>2</sub>S are formed under this low E/S ratio and thus the signal of Na<sub>2</sub>S is weak. Second, the generated Na<sub>2</sub>S can be covered by other intermediates. Third, a conventional XRD instrument with limited resolution and power was

employed to conduct the *in situ* experiment. Therefore, diffraction peaks of Na<sub>2</sub>S can hardly be observed by the *in situ* XRD.

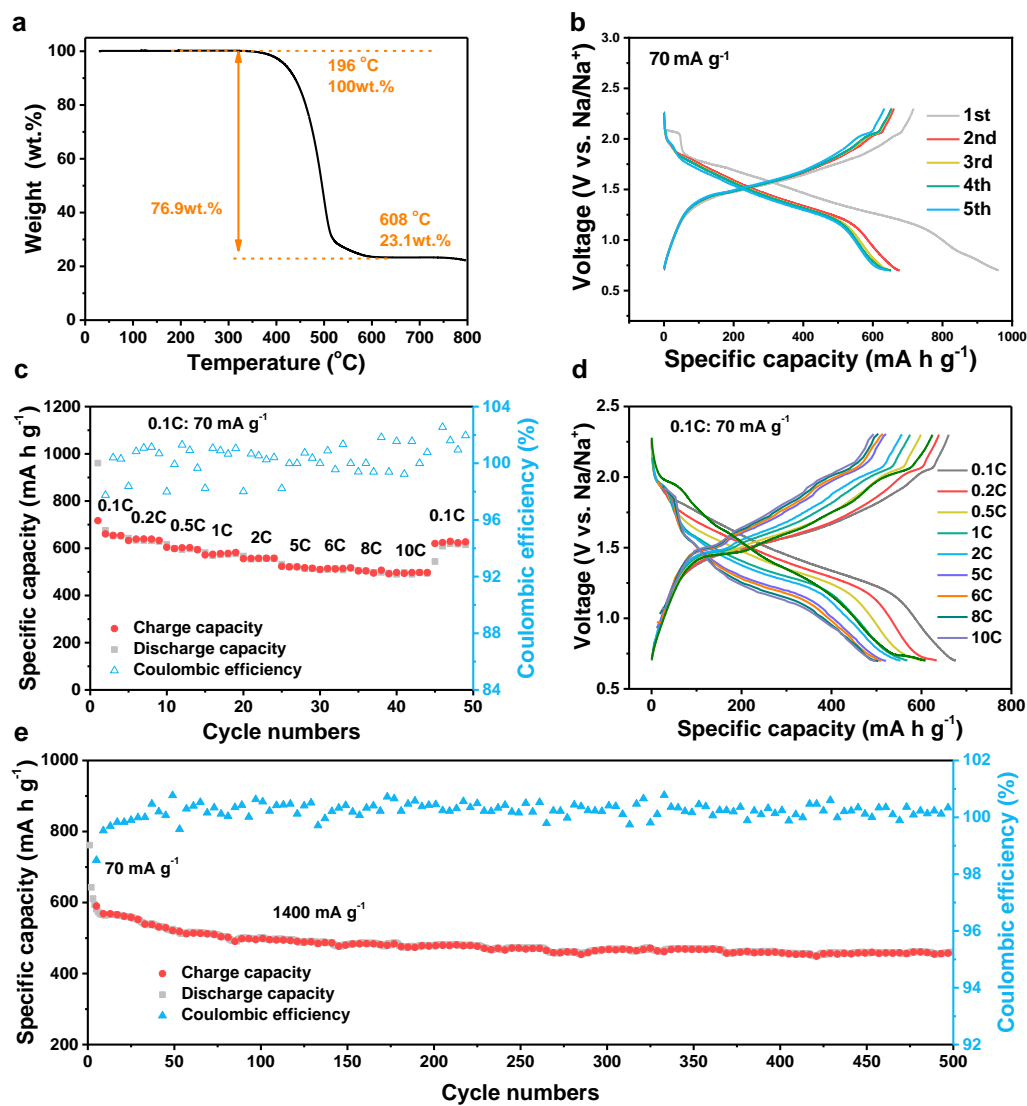

Supplementary Figure 36. Electrochemical performance of Se@Fe<sub>3</sub>N-NMCN.

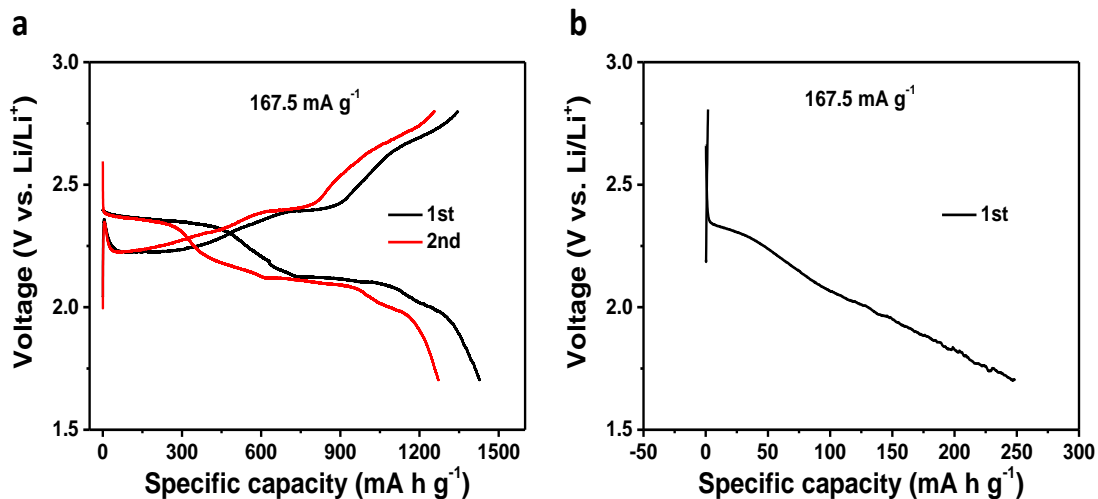

**Supplementary Figure 37.** Discharge/charge curves of S@Fe<sub>3</sub>N-NMCN with 1M LiTFSI in DOL/DME (1:1 by volume) containing 0.1M LiNO<sub>3</sub> additive (a) and 1M LiPF<sub>6</sub> in EC/DEC/EMC (1:1:1 by volume) electrolyte (b) in Li-S batteries.

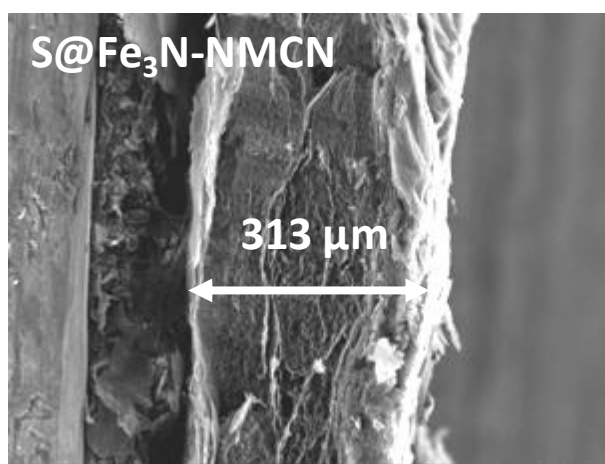

**Supplementary Figure 38.** Side view FESEM image of S@Fe<sub>3</sub>N-NMCN.

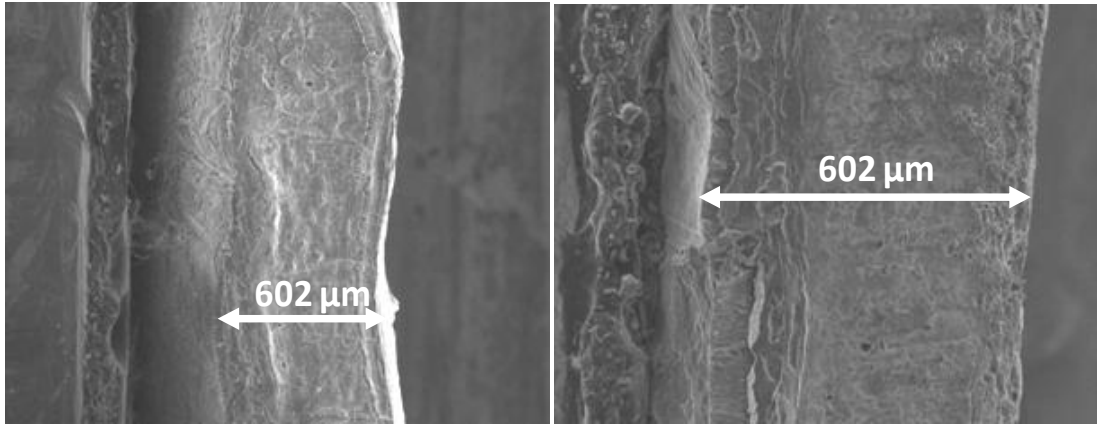

**Supplementary Figure 39.** Side view FESEM images of sodium foils.

**Supplementary Table 1.** Elemental analysis of BC-P, BC-300, BC-500 and BC-800.

| weight percentage (wt.%) | BC-P  | BC-300 | BC-500 | BC-800 |
|--------------------------|-------|--------|--------|--------|
| C                        | 46.86 | 56.83  | 71.85  | 89.77  |
| N                        | 0.12  | 31.45  | 20.65  | 6.45   |
| O                        | 46.37 | 9.07   | 4.76   | 2.56   |
| H                        | 6.65  | 2.64   | 2.74   | 1.22   |

**Supplementary Table 2.** XPS analysis of BC-P, BC-300, BC-500 and BC-800.

| Weight percentage (wt.%) | BC-P  | BC-300 | BC-500 | BC-800 |
|--------------------------|-------|--------|--------|--------|
| C                        | 56.07 | 48.26  | 63.37  | 84.12  |
| N                        | 0.36  | 40.90  | 26.02  | 7.63   |
| O                        | 43.57 | 10.84  | 10.61  | 8.25   |

**Supplementary Table 3.** BET surface areas, total pore volume, micropores volume and mesopores volume of BC-Ar, BC-NH<sub>3</sub> and Fe<sub>3</sub>N-NMCN.

| Sample                 | Surface area (m <sup>2</sup> g <sup>-1</sup> ) | Total pore volume (cm <sup>3</sup> g <sup>-1</sup> ) | Micropores volume (cm <sup>3</sup> g <sup>-1</sup> ) | Mesopores volume (cm <sup>3</sup> g <sup>-1</sup> ) | Ratio of micropores (%) |
|------------------------|------------------------------------------------|------------------------------------------------------|------------------------------------------------------|-----------------------------------------------------|-------------------------|
| BC-Ar                  | 411                                            | 0.41                                                 | 0.12                                                 | 0.29                                                | 29.3                    |
| BC-NH <sub>3</sub>     | 425                                            | 0.44                                                 | 0.13                                                 | 0.31                                                | 29.5                    |
| Fe <sub>3</sub> N-NMCN | 535                                            | 0.55                                                 | 0.17                                                 | 0.38                                                | 31.0                    |

**Supplementary Table 4.** Elemental analysis of BC-Ar, BC-NH<sub>3</sub> and Fe<sub>3</sub>N-NMCN.

| Weight percentage (wt.%) | BC-Ar | BC-NH <sub>3</sub> | Fe <sub>3</sub> N-NMCN |
|--------------------------|-------|--------------------|------------------------|
| C                        | 90.70 | 89.77              | 61.50                  |
| H                        | 1.70  | 1.22               | 1.48                   |
| N                        | 0.34  | 6.45               | 10.21                  |
| O                        | 7.26  | 2.56               | 12.38                  |

**Supplementary Table 5.** Fitted EIS results of batteries with S@BC-Ar, S@BC-NH<sub>3</sub> and S@Fe<sub>3</sub>N-NMCN before cycle.

| Sample                   | R <sub>s</sub> (Ω) | R <sub>p</sub> (Ω) |
|--------------------------|--------------------|--------------------|
| S@Fe <sub>3</sub> N-NMCN | 3.97               | 67.46              |
| S@BC-NH <sub>3</sub>     | 0.81               | 93.88              |
| S@BC-Ar                  | 1.39               | 119.70             |

**Supplementary Table 6.** Fitted EIS results of batteries with S@BC-Ar, S@BC-NH<sub>3</sub> and S@Fe<sub>3</sub>N-NMCN after cycle.

| Sample                   | R <sub>s</sub> (Ω) | R <sub>f</sub> (Ω) | R <sub>ct</sub> (Ω) |
|--------------------------|--------------------|--------------------|---------------------|
| S@Fe <sub>3</sub> N-NMCN | 7.02               | 2.03               | 1.40                |
| S@BC-NH <sub>3</sub>     | 3.60               | 2.10               | 1.53                |
| S@BC-Ar                  | 4.71               | 6.21               | 1.92                |

**Supplementary Table 7.** EIS fitting results of batteries with S@Fe<sub>3</sub>N-NMCN after different cycles.

| Sample          | R <sub>s</sub> (Ω) | R <sub>1</sub> (Ω) |
|-----------------|--------------------|--------------------|
| Pristine        | 3.95               | 71.25              |
| After 5 cycles  | 2.70               | 6.86               |
| After 15 cycles | 3.06               | 0.89               |
| After 25 cycles | 2.69               | 0.75               |
| After 35 cycles | 3.02               | 0.71               |
| After 45 cycles | 2.97               | 0.81               |
| After 55 cycles | 2.42               | 1.00               |

**Supplementary Table 8.** Comparisons of cathode materials for RT Na-S batteries

| Samples                                                                                                 | S loading | Electrolyte                                                  | Cycle performance |              |                                                           | Rate capability                                                                                                                                                    |
|---------------------------------------------------------------------------------------------------------|-----------|--------------------------------------------------------------|-------------------|--------------|-----------------------------------------------------------|--------------------------------------------------------------------------------------------------------------------------------------------------------------------|
|                                                                                                         |           |                                                              | Rate              | Cycle number | Decay rate (per cycle)                                    |                                                                                                                                                                    |
| This work                                                                                               | 85wt. %   | 1 M NPF <sub>6</sub> in DOL/DIGLYME                          | 5C                | 2868         | Almost no decay                                           | 1238.6, 1073.7, 936.6, 866.2, 798.6, 706.9, 671.9, 664.2, 658.4 mAh g <sup>-1</sup> at 167.5, 335, 837.5, 1675, 3350, 8375, 10050, 13400, 16750 mA g <sup>-1</sup> |
| Nickel hollow spheres concatenated by nitrogen-doped carbon fibers <sup>[11]</sup><br><b>S@Ni-NCFs</b>  | 36%       | 1 M NaClO <sub>4</sub> in TEGDME                             | 0.5C              | 270          | 0.17%                                                     | 738.7, 565.6, 481.1, 401.9, 311.1, 249.8 and 181.7 mAh g <sup>-1</sup> at 335, 503, 838, 1675, 3350, 5025 and 8375 mA g <sup>-1</sup>                              |
| sulfurized polyacrylonitrile nanofiber <sup>[2]</sup><br><b>SPAN</b>                                    | 41%       | 1 M NaPF <sub>6</sub> in EC/DEC                              | 0.1C              | 200          | 0.11%                                                     | 310, 210, 110, 72 mAh g <sup>-1</sup> at 16.8, 168, 838, 1675 mA g <sup>-1</sup>                                                                                   |
| Microporous carbon template derived from sucrose <sup>[3]</sup><br><b>S@C</b>                           | 35%       | 1 M NaPF <sub>6</sub> + 0.25M NaNO <sub>3</sub> in TEGDME    | 1C                | 1500         | 0.016%                                                    | 700, 550, 470, 370 mAh g <sup>-1</sup> at 168, 419, 838, 1675 mA g <sup>-1</sup>                                                                                   |
| Carbon fiber cloth <sup>[4]</sup><br><b>CFC/S</b>                                                       | 24.4%     | 1.5 M NaClO <sub>4</sub> + 0.2 M NaNO <sub>3</sub> in TEGDME | 0.1C              | 300          | 0.23%                                                     | 491, 265, 141, 80, 48 mAh g <sup>-1</sup> at 83.8, 168, 335, 838, 1675 mA g <sup>-1</sup>                                                                          |
| Nitrogen doped carbon from MOF <sup>[5]</sup><br><b>cZIF-8/S</b>                                        | 50%       | 1 M NaClO <sub>4</sub> in TEGDME                             | 0.2C              | 250          | 0.17%                                                     | 1000, 850, 650, 480, 220 mAh g <sup>-1</sup> at 168, 335, 838, 1675, 3350 mA g <sup>-1</sup>                                                                       |
| Hollow carbon sphere coated with MoS <sub>2</sub> <sup>[6]</sup><br><b>S@HCS/MoS<sub>2</sub></b>        | 44%       | 1 M NaClO <sub>4</sub> in TEGDME                             | 1C                | 1000         | 0.06%                                                     | 1309, 856, 663, 559, 476 mAh g <sup>-1</sup> at 168, 335, 838, 1675, 3350 mA g <sup>-1</sup>                                                                       |
| Free-standing carbon nanofibers embedded with cobalt nanoparticles <sup>[7]</sup><br><b>Co@NPCNFs/S</b> | 38%       | 1 M NaClO <sub>4</sub> +EC/DEC                               | 0.1C              | 800          | 0.07% at 100 <sup>th</sup><br>0.038% at 800 <sup>th</sup> | 871, 683, 275, 154 mAh g <sup>-1</sup> at 168, 838, 1675, 5025 mA g <sup>-1</sup>                                                                                  |
| VO <sub>2</sub> nanoflowers wrapped by RGO <sup>[8]</sup><br><b>RGO/VO<sub>2</sub></b>                  | 40%       | 1 M NaClO <sub>4</sub> in TEGDME                             | 2C                | 1000         | 0.07%                                                     | 558.1, 308.1, 234, 194 mAh g <sup>-1</sup> at 335, 838, 1675, 3350 mA g <sup>-1</sup>                                                                              |

|                                                                         |       |                                             |                         |      |        |                                                                                                           |
|-------------------------------------------------------------------------|-------|---------------------------------------------|-------------------------|------|--------|-----------------------------------------------------------------------------------------------------------|
| High-surface-area mesoporous carbon with nanocopper                     | 50%   | 1 M NaClO <sub>4</sub> in EC/DMC            | 0.03C                   | 110  | 0.127% | 700, 560, 440, 320, 100 mAh g <sup>-1</sup> at 50.3, 101, 1005, 2010, 5025 mA g <sup>-1</sup>             |
| <b>HSMC-Cu-S</b>                                                        |       |                                             |                         |      |        |                                                                                                           |
| Double-shell carbon microspheres assembled by hollow carbon nanobeads   | 34%   | 1M NaClO <sub>4</sub> in PC/EC + 5wt.% FEC  | 100 mA g <sup>-1</sup>  | 350  | 0.17%  | 402, 205, 74, 57 mAh g <sup>-1</sup> at 100, 200, 500, 2000 mA g <sup>-1</sup>                            |
| <b>PCMs-S</b>                                                           |       |                                             |                         |      |        |                                                                                                           |
| Thioether bond functionalized carbon                                    | 21.5% | 1 M NaClO <sub>4</sub> +PC+ 5wt.% FEC       | 100 mA g <sup>-1</sup>  | 200  | 0.17%  | 500, 430, 405, 390, 345, 300 mA h g <sup>-1</sup> at 100, 200, 400, 800, 1600, 3200 mA g <sup>-1</sup>    |
| <b>SC</b>                                                               |       |                                             |                         |      |        |                                                                                                           |
| Mesoporous hollow carbon nanospheres                                    | 46%   | 1 M NaClO <sub>4</sub> + PC/EC + 5 wt.% FEC | 100 mA g <sup>-1</sup>  | 200  | 0.056% | 391, 386, 352, 305, 174, 127 mAh g <sup>-1</sup> at 100, 200, 500, 1000, 2000, 5000 mA g <sup>-1</sup>    |
| <b>S@iMCHS</b>                                                          |       |                                             |                         |      |        |                                                                                                           |
| Hollow carbon nanospheres with Fe on the surface                        | 40%   | 1 M NaClO <sub>4</sub> + PC/EC + 5 wt.% FEC | 100 mA g <sup>-1</sup>  | 1000 | 0.06%  | 820, 498, 383, 313, 269 and 220 mAh g <sup>-1</sup> at 100, 200, 500, 1000, 2000, 5000 mA g <sup>-1</sup> |
| <b>S@Fe-HC</b>                                                          |       |                                             |                         |      |        |                                                                                                           |
| Nitrogen-doped porous carbon nanotubes with nickel sulfide nanocrystals | 56%   | 1 M NaClO <sub>4</sub> in EC/PC+ 3 wt.% FEC | 1000 mA g <sup>-1</sup> | 750  | 0.078% | 760, 691, 557, 457, 346, 203 mAh g <sup>-1</sup> at 100, 200, 500, 1000, 2000, 5000 mA g <sup>-1</sup>    |
| <b>NiS<sub>2</sub>@NPCTs/S</b>                                          |       |                                             |                         |      |        |                                                                                                           |

## Reference

- [1] B. Guo, W. Du, T. Yang, J. Deng, D. Liu, Y. Qi, J. Jiang, S.-J. Bao, M. Xu. Nickel hollow spheres concatenated by nitrogen-doped carbon fibers for enhancing electrochemical kinetics of sodium-sulfur batteries. *Adv. Sci.* 1902617, doi: 10.1002/advs.201902617 (2019).
- [2] I. Kim, C. H. Kim, S. H. Choi, J. P. Ahn, J. H. Ahn, K. W. Kim, E. J. Cairns, H. J. Ahn. A singular flexible cathode for room temperature sodium/sulfur battery. *J. Power Sources*, **307**, 31-37, doi: 10.1016/j.jpowsour.2015.12.035 (2016).



- [3] R. Carter, L. Oakes, A. Douglas, N. Muralidharan, A. P. Cohn, C. L. Pint. A sugar-derived room-temperature sodium sulfur battery with long term cycling stability. *Nano lett.* **17**, 1863-1869, doi: 10.1021/acs.nanolett.6b05172 (2017).
- [4] Q.-Q. Lu, X.-Y. Wang, J. Cao, C. Chen, K. Chen, Z.-F. Zhao, Z.-Q. Niu, J. Chen. Freestanding carbon fiber cloth/sulfur composites for flexible room-temperature sodium-sulfur batteries. *Energy Storage Mater.* **8**, 77, doi: <http://dx.doi.org/10.1016/j.ensm.2017.05.001> (2017).
- [5] Y. M. Chen, W. F. Liang, S. Li, F. Zou, S. M. Bhaway, Z. Qiang, M. Gao, B. D. Vogt, Y. Zhu. A nitrogen doped carbonized metal-organic framework for high stability room temperature sodium-sulfur batteries. *J. Mater. Chem. A.* **4**, 12471-12478, doi: 10.1039/c6ta04529d (2016).
- [6] T. Yang , B. Guo, W. Du, M. K. Aslam, M. Tao, W. Zhong, Y. Chen, S.-J.n Bao, X. Zhang, M. Xu. Design and construction of sodium polysulfides defense system for room-temperature Na-S battery. *Adv. Sci.* 1901557, doi: 10.1002/advs.201901557 (2019).
- [7] W. Du, W. Gao, T. Yang, B. Guo, L. Zhang, S.-j. Bao, Y. Chen, M. Xu. Cobalt nanoparticles embedded into free-standing carbon nanofibers as catalyst for room-temperature sodium-sulfur batteries. *J. Colloid & Inter. Sci.* **565**, 63-69, doi: 10.1016/j.jcis.2020.01.010J (2020).
- [8] W. Du, Y. Wu, T. Yang, B. Guo, D. Liu, S.-J. Bao, M. Xu. Rational construction of rGO/VO<sub>2</sub> nanoflowers as sulfur multifunctional hosts for room temperature Na-S batteries. *Chem. Eng. J.* **379**, 122359, doi: 10.1016/j.cej.2019.122359 (2020).

- [9] S. Zheng, P. Han, Z. Han, P. Li, H. Zhang, J. Yang. Boosting performance of Na-S batteries using sulfur-doped  $Ti_3C_2T_x$  MXene nanosheets with a strong affinity to sodium polysulfides. *Adv. Energy Mater.* 1400226, doi: 10.1021/acsnano.9b04977 (2014).
- [10] L. Zhang, B. Zhang, Y. Dou, Y. Wang, M. Al-Mamun, X. Hu, H. Liu. Nano-copper-assisted immobilization of sulfur in high-surface-area mesoporous carbon cathodes for room temperature Na-S batteries. *ACS Appl. Mater. Inter.* **10**(24), 20422-20428, doi: 10.1002/aenm.201400226 (2014).
- [11] K. J. Chen, H. J. Li, Y. Xu, K. Liu, H. M. Li, X. W. Xu, X. Q. Qiu, M. Liu. Self-assembling hollow carbon nanobeads into double-shell microspheres as a hierarchical sulfur host for sustainable room-temperature sodium-sulfur batteries. *Nanoscale.* **11**, 5967-5973, doi: 10.1021/acsnano.9b04977 (2019).
- [12] Y. -X. Wang, J. P. Yang, W. H. Lai, S. -L. Chou, Q. -F. Gu, H. K. Liu, D. Y. Zhao, S. X. Dou. Achieving high-performance room-temperature sodium-sulfur batteries with S@interconnected mesoporous carbon hollow nanospheres. *J. Am. Chem. Soc.* **138**, 16576-16579, doi: 10.1021/jacs.6b08685 (2016).
- [13] B.-W. Zhang, T. Sheng, Y.-X. Wang, S. Chou, K. Davey, S.-X. Dou, Shi-Zhang Qiao. Long-life room-temperature sodium-sulfur batteries by virtue of transition-metal-nanocluster-sulfur interactions. *Angew. Chem. Int. Ed.* **57**, 1-6, doi: 10.1002/anie.201811080 (2018).
- [14] Z. Yan, J. Xiao, W. Lai, L. Wang, F. Gebert, Y. Wang, Q. Gu, H. Liu, S.-L. Chou, H. Liu, S.-X. Dou. Nickel sulfide nanocrystals on nitrogen-doped porous carbon

nanotubes with high-efficiency electrocatalysis for room-temperature sodium-sulfur batteries. *Nature Comm.* **10**, 4793, doi: 10.1038/s41467-019-11600-3 (2019).
